# Supplementary material for: H2O and CO2 surface contamination of the lithium garnet Li7La3Zr2O12 solid electrolyte
Source: Royal Society of Chemistry journal article supplement (doi:10.1039/d1ta10228a), 2022-01-01
Supplement: d1ta10228a1.pdf [file d1ta10228a1.pdf]

—Supporting Information—

H<sub>2</sub>O and CO<sub>2</sub> surface contamination of the  
lithium garnet Li<sub>7</sub>La<sub>3</sub>Zr<sub>2</sub>O<sub>12</sub> solid electrolyte

Yuheng Li,<sup>†</sup> Asmee M. Prabhu,<sup>‡</sup> Tej S. Choksi,<sup>\*,‡</sup> and Pieremanuele Canepa<sup>\*,†,¶</sup>

<sup>†</sup>*Department of Materials Science and Engineering, National University of Singapore, 9  
Engineering Drive 1, 117575, Singapore*

<sup>‡</sup>*School of Chemical and Biomedical Engineering, Nanyang Technological University,  
Singapore 637459, Singapore*

<sup>¶</sup>*Department of Chemical and Biomolecular Engineering, National University of Singapore,  
4 Engineering Drive 4, 117585, Singapore*

E-mail: [tej.choksi@ntu.edu.sg](mailto:tej.choksi@ntu.edu.sg); [pcanepa@nus.edu.sg](mailto:pcanepa@nus.edu.sg)

# Contents

|    |                                                                  |    |
|----|------------------------------------------------------------------|----|
| S1 | Benchmark Tests on Dispersion Corrections                        | S3 |
| S2 | Convergence Tests on Bulk-Like Percentage in Slab                | S3 |
| S3 | Unit Cell of Slab Model                                          | S4 |
| S4 | Tests on Single-Point Energy Cutoff                              | S5 |
| S5 | Metal Sites' Local Environment and H <sub>2</sub> O Dissociation | S5 |
| S6 | Forced Dissociation of H <sub>2</sub> O at High Coverage         | S6 |
| S7 | Geometry of Surface Carbonates                                   | S6 |
| S8 | Post-Adsorption Mulliken Charge                                  | S7 |
|    | References                                                       | S7 |

## S1 Benchmark Tests on Dispersion Corrections

Table S1: Benchmark tests for dispersion corrections. Experimental and calculated lattice parameters  $a$  and  $c$  (in Å) for bulk tetragonal  $\text{Li}_7\text{La}_3\text{Zr}_2\text{O}_{12}$ . Mean absolute error (MAE, in Å) of the calculated lattice parameters. Surface energy ( $\gamma$ , in  $\text{J m}^{-2}$ ) for stoichiometric Zr-terminated (110) surface, calculated using slab models re-scaled with the bulk lattice parameters.

| Method                  | $a$    | $c$    | MAE   | $\gamma$ |
|-------------------------|--------|--------|-------|----------|
| Experiment <sup>a</sup> | 13.134 | 12.663 | —     | —        |
| PBE <sup>b</sup>        | 13.204 | 12.704 | 0.060 | 1.52     |
| PBE                     | 13.228 | 12.708 | 0.078 | 1.46     |
| PBE+D3                  | 13.107 | 12.587 | 0.043 | 1.91     |
| PBE+D3-BJ               | 13.082 | 12.586 | 0.060 | 1.96     |

<sup>a</sup> Data from Awaka et al.<sup>1</sup>

<sup>b</sup> Data from Canepa et al.<sup>2</sup>

## S2 Convergence Tests on Bulk-Like Percentage in Slab

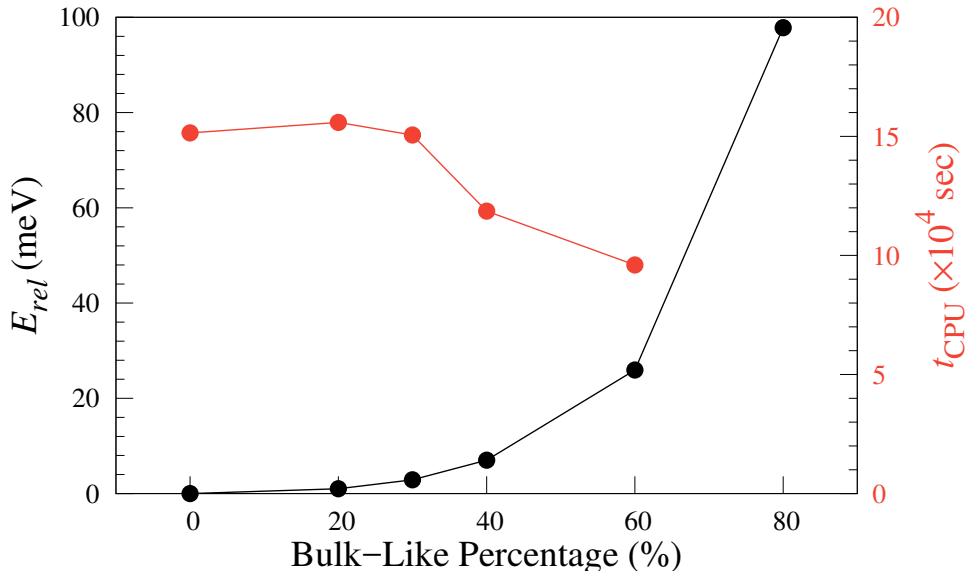

Figure S1: Change of total energy for the slab model and CPU time as functions of bulk-like percentage. Total energy for the slab calculated with zero percent bulk-like region (all atomic positions were relaxed) is used as reference. The CPU time parameter is used to identify reasonable consumption of computational resources for the large 248-atom system.

### S3 Unit Cell of Slab Model

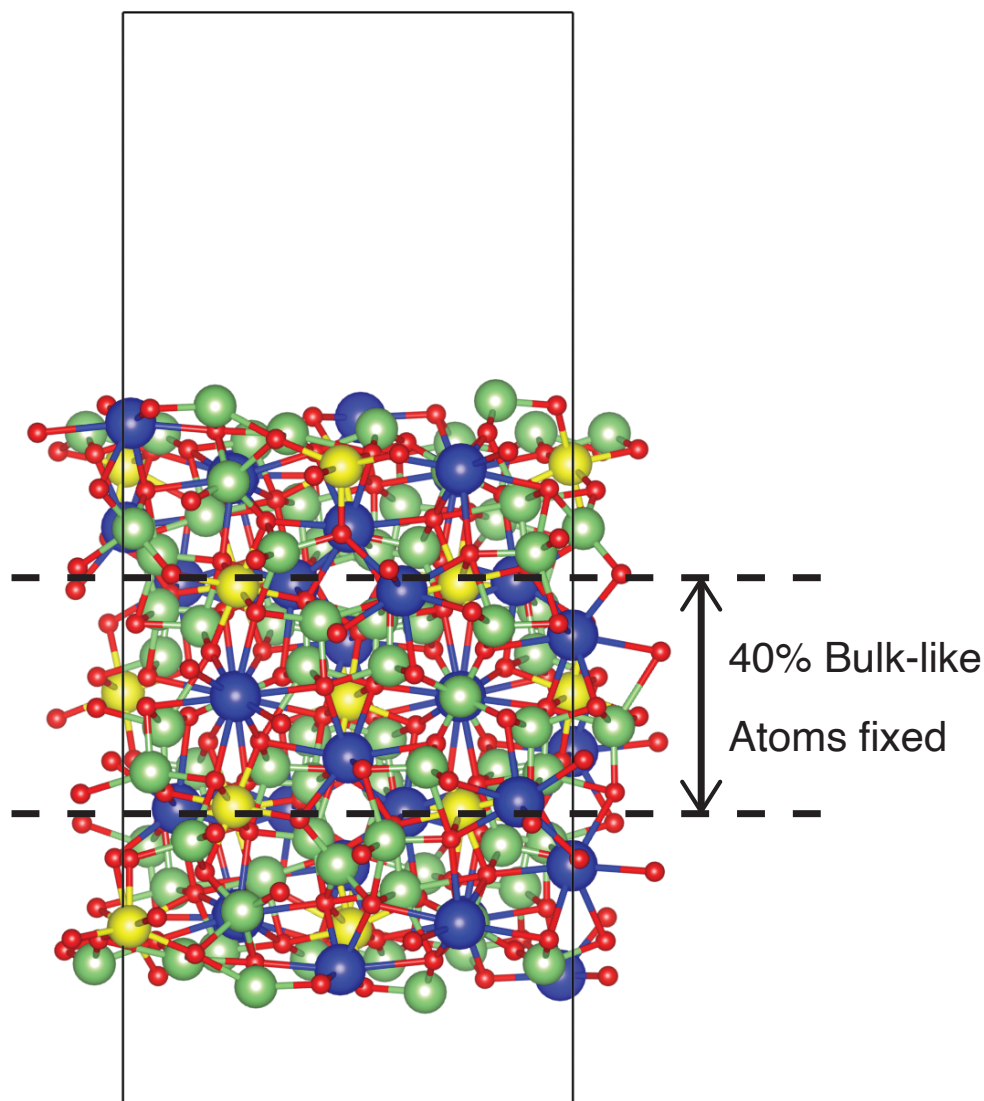

Figure S2: Side view of the complete slab unit cell for the (010) Li-terminated off-stoichiometry surface of  $\text{Li}_7\text{La}_3\text{Zr}_2\text{O}_{12}$ . The dashed lines and double-headed arrow show the center bulk-like region (40%), where the atomic positions are fixed during structural optimization.

## S4 Tests on Single-Point Energy Cutoff

Table S2: Adsorption energy ( $\Delta E_{\text{ads}}$ , in eV) from PBE (without D3-BJ) calculations, where optimizations were done with an energy cutoff of 440 eV, and single-point calculations were done with different energy cutoffs of 440 eV and 520 eV.

| No./Molecule              | Model Name | $\Delta E_{\text{ads}}$ @ 440 eV | $\Delta E_{\text{ads}}$ @ 520 eV |
|---------------------------|------------|----------------------------------|----------------------------------|
| single H <sub>2</sub> O   | Li[3O]     | -1.02                            | -1.02                            |
|                           | Li[2O]     | -0.97                            | -0.96                            |
| multiple H <sub>2</sub> O | 2/5 ML     | -0.99                            | -0.99                            |
|                           | 3/5 ML     | -0.91                            | -0.90                            |
|                           | 4/5 ML     | -0.93                            | -0.93                            |
|                           | 5/5 ML     | -0.93                            | -0.93                            |
|                           | 6/5 ML     | -0.91                            | -0.91                            |
| single CO <sub>2</sub>    | O[LiLaZr]  | -1.87                            | -1.86                            |

## S5 Metal Sites' Local Environment and H<sub>2</sub>O Dissociation

Table S3: Distance (in Å) between water adsorption sites and their neighboring O atoms. Site is the adsorption site listed in the order of adsorption energy from more negative to more positive.  $\Delta E_{\text{ads}}$  informs adsorption energy for the site. LiOH indicates whether the adsorbed H<sub>2</sub>O molecule dissociates and promotes LiOH formation. Distance lists O–Site distance before adsorption for all O atoms bonded to the site. \* denotes the surface O atom that forms bond with the dissociated proton from H<sub>2</sub>O.

| Site   | $\Delta E_{\text{ads}}$ | LiOH | Distance                           |
|--------|-------------------------|------|------------------------------------|
| Li[3O] | -1.21                   | Yes  | 1.91, 1.92*, 2.11                  |
| Li[2O] | -1.14                   | No   | 1.83, 1.84                         |
| La[5O] | -0.85                   | No   | 2.20, 2.30, 2.32, 2.47, 2.74       |
| La[6O] | -0.80                   | No   | 2.34, 2.38, 2.41, 2.47, 2.49, 2.73 |
| Li[3O] | -0.65                   | No   | 1.97, 2.01, 2.08                   |

## S6 Forced Dissociation of H<sub>2</sub>O at High Coverage

Table S4: Water adsorption energy (in eV/molecule) at increasing number of molecules (ML). Site is the adsorption site.  $\delta\Delta E_{\text{ads}}$  informs the change of  $\Delta E_{\text{ads}}$  upon the addition of a H<sub>2</sub>O molecule. All water molecules were forced to dissociate before relaxation. In parallel to Table 1 in the main text, the number of dissociated water molecule (H<sub>2</sub>O) after relaxation is indicated, and LiOH indicates whether the addition of a new H<sub>2</sub>O molecule promotes LiOH formation. \* denotes that a previously dissociated H<sub>2</sub>O has become intact.

| ML  | Site   | $\Delta E_{\text{ads}}$ | $\delta\Delta E_{\text{ads}}$ | H <sub>2</sub> O | LiOH |
|-----|--------|-------------------------|-------------------------------|------------------|------|
| 1/5 | Li[3O] | -1.21                   | —                             | 1                | Yes  |
| 2/5 | Li[2O] | -1.24                   | -0.03                         | 2                | Yes  |
| 3/5 | La[5O] | -1.13                   | +0.11                         | 2                | No   |
| 4/5 | La[6O] | -1.06                   | +0.07                         | 2*               | Yes  |
| 5/5 | Li[3O] | -1.10                   | -0.04                         | 3                | Yes  |
| 6/5 | Li[3O] | -1.13                   | -0.03                         | 3*               | Yes  |

## S7 Geometry of Surface Carbonates

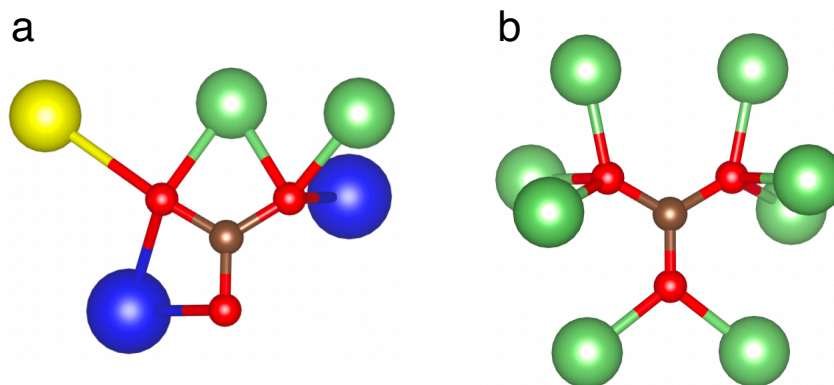

Figure S3: Structure unit of CO<sub>3</sub><sup>2-</sup> and bonded metal ions for (a) carbonate formed on the most favorable O[LiLaZr] site upon CO<sub>2</sub> adsorption and (b) bulk Li<sub>2</sub>CO<sub>3</sub> from Ref. 3 (ICSD 66941).

## S8 Post-Adsorption Mulliken Charge

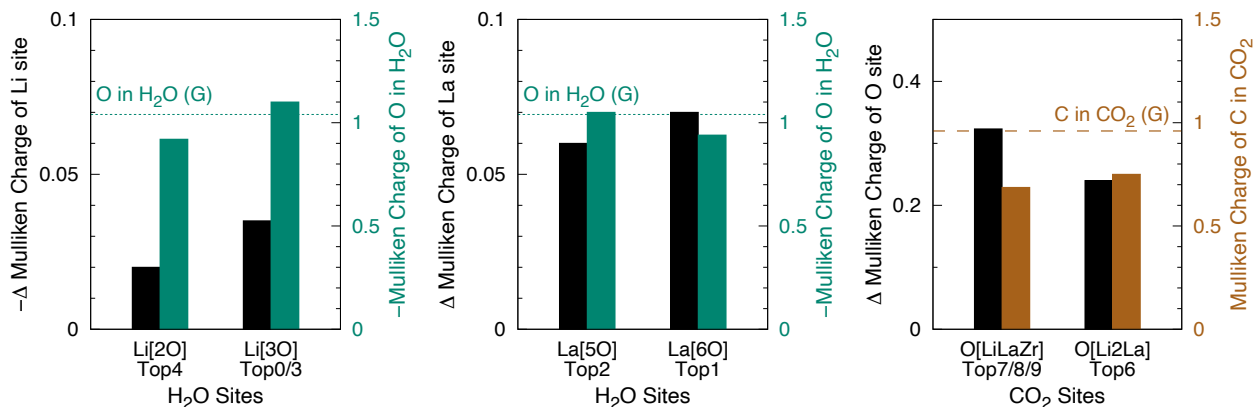

Figure S4: Change of Mulliken charge for all adsorption sites and Mulliken charge of O in H<sub>2</sub>O and C in CO<sub>2</sub> after adsorption. The horizontal dashed lines mark Mulliken charge of gas-phase H<sub>2</sub>O and CO<sub>2</sub>.

## References

- (1) Awaka, J.; Kijima, N.; Hayakawa, H.; Akimoto, J. Synthesis and Structure Analysis of Tetragonal Li<sub>7</sub>La<sub>3</sub>Zr<sub>2</sub>O<sub>12</sub> with the Garnet-Related Type Structure. *Journal of Solid State Chemistry* **2009**, *182*, 2046–2052.
- (2) Canepa, P.; Dawson, J. A.; Sai Gautam, G.; Statham, J. M.; Parker, S. C.; Islam, M. S. Particle Morphology and Lithium Segregation to Surfaces of the Li<sub>7</sub>La<sub>3</sub>Zr<sub>2</sub>O<sub>12</sub> Solid Electrolyte. *Chem. Mater.* **2018**, *30*, 3019–3027.
- (3) Idemoto, Y.; Richardson, J. W.; Koura, N.; Kohara, S.; Loong, C.-K. Crystal Structure of (Li<sub>x</sub>K<sub>(1-x)</sub>)<sub>2</sub>CO<sub>3</sub> (x = 0, 0.43, 0.5, 0.62, 1) by Neutron Powder Diffraction Analysis. *Journal of Physics and Chemistry of Solids* **1998**, *59*, 363–376.
